# Supplementary material
Source: PubMed Central journal article supplement (PMC4151794)
Supplement: mp500290f_si_001.pdf [file mp500290f_si_001.pdf]

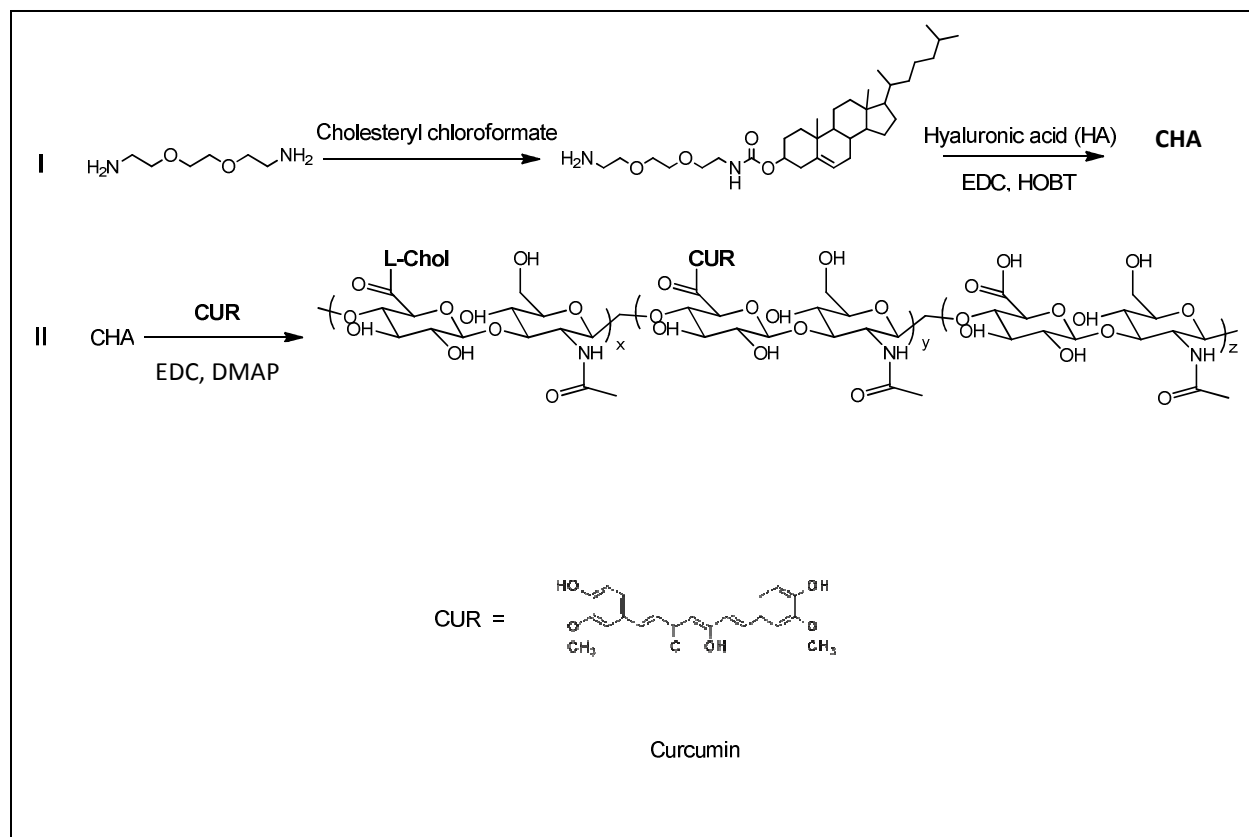

Figure S1. Scheme of the chemical synthesis of CHA-CUR conjugate. Part I: CHA conjugate was synthesized by modification of hyaluronic acid (HA) cholesteryl-amine linker (L-Chol) in reaction using water-soluble EDC carbodiimide. Part II: Curcumin (CUR) was conjugated with CHA by esterification of carboxyl groups in the HA in the presence of EDC and DMAP.

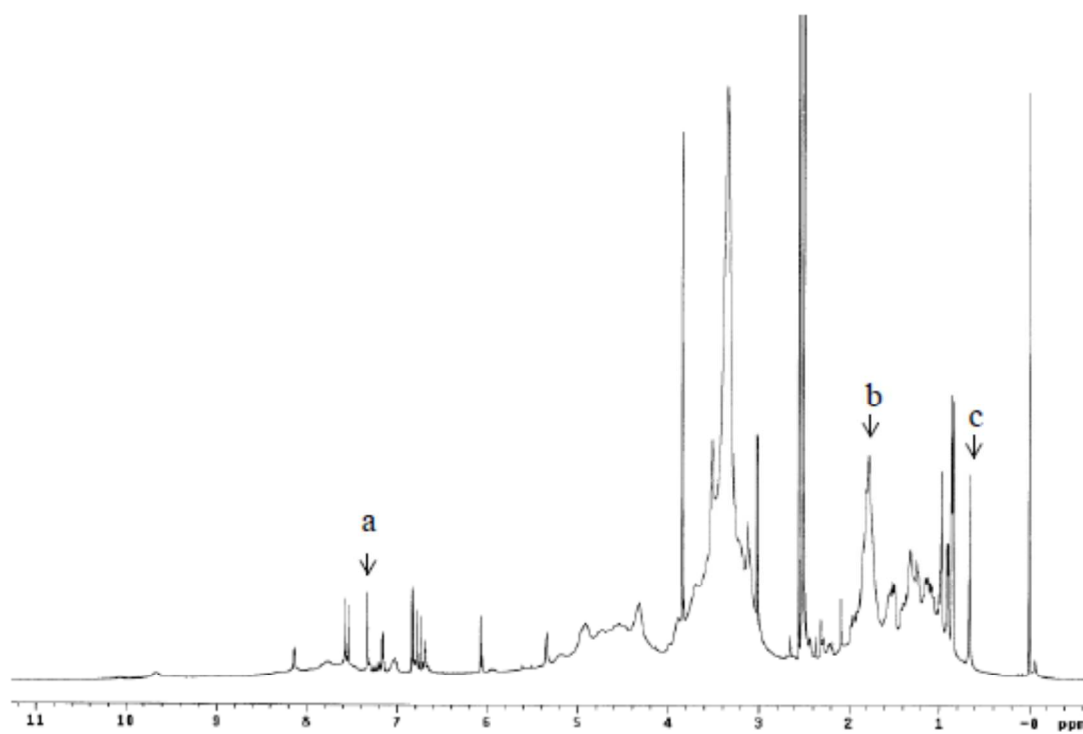

Figure S2. Proton NMR (500 MHz) spectrum of CHA-CUR in d-DMSO. Peaks a, b and c are characteristic to CUR, HA and cholesterol, respectively, have been used to calculate their contents.

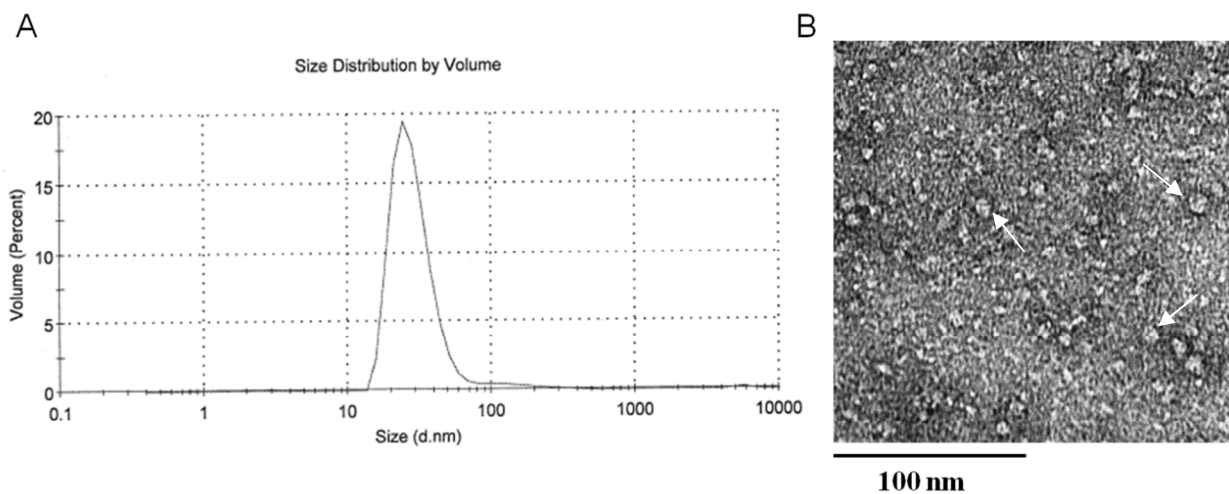

Figure S3. (A) Size distribution of CHA-CUR measured by the dynamic light scattering (1%, PBS, 25°C). (B), Morphology of CHA-CUR particles determined by transmission electronic microscopy (TEM, vanadate staining).

**Table S1. Physicochemical properties of CHA-CUR**

| <b>Nanogel</b> | <b>Size (nm)</b> | <b>PDI</b> | <b>Drug content by weight (%)</b> | <b>Cholesterol content by weight (%)</b> | <b>Zeta potential (mV)</b> |
|----------------|------------------|------------|-----------------------------------|------------------------------------------|----------------------------|
| CHA-CUR        | 29.2±5.4         | 0.4±0.1    | 7.0±0.6                           | 3.9±0.1                                  | -38.4±3.9                  |

Values are mean ± standard deviation (SD) (n=3).
